# Supplementary material for: Feedback from retinal ganglion cells to the inner retina
Source: PubMed Central journal article supplement (PMC8297895; doi:10.1371/journal.pone.0254611), 2021-07-22

**A**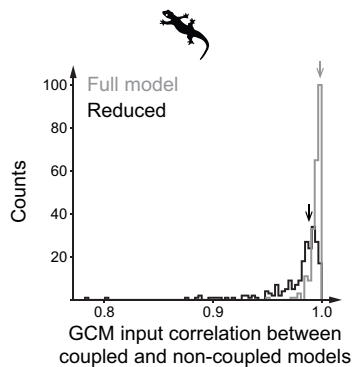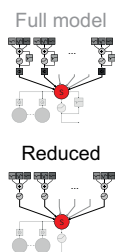**D**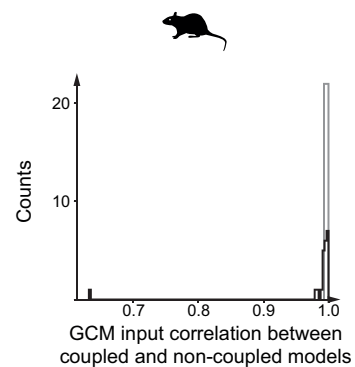**B**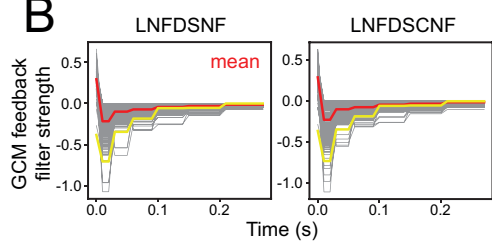**E**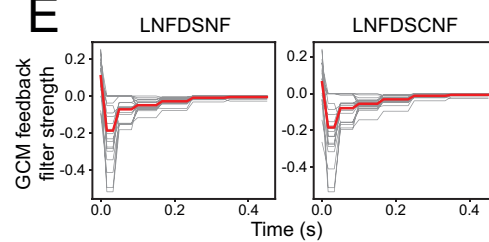**C**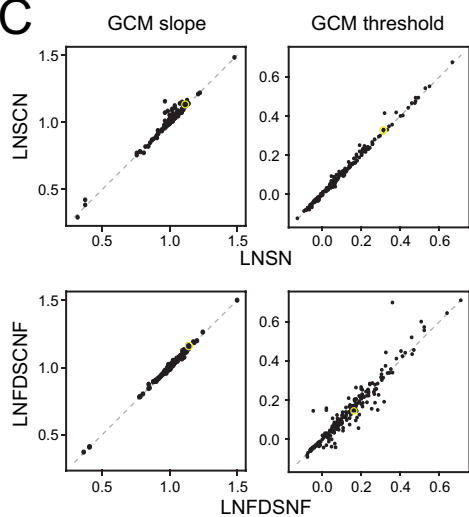**F**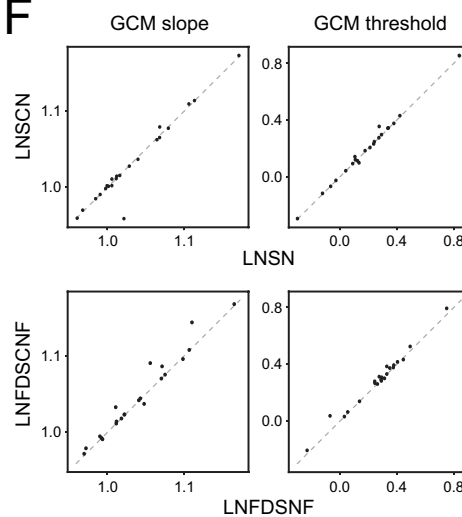

Supplement: pone.0254611.s004.pdf [file pone.0254611.s004.pdf]
