# Supplementary material for: Feedback from retinal ganglion cells to the inner retina
Source: PubMed Central journal article supplement (PMC8297895; doi:10.1371/journal.pone.0254611), 2021-07-22

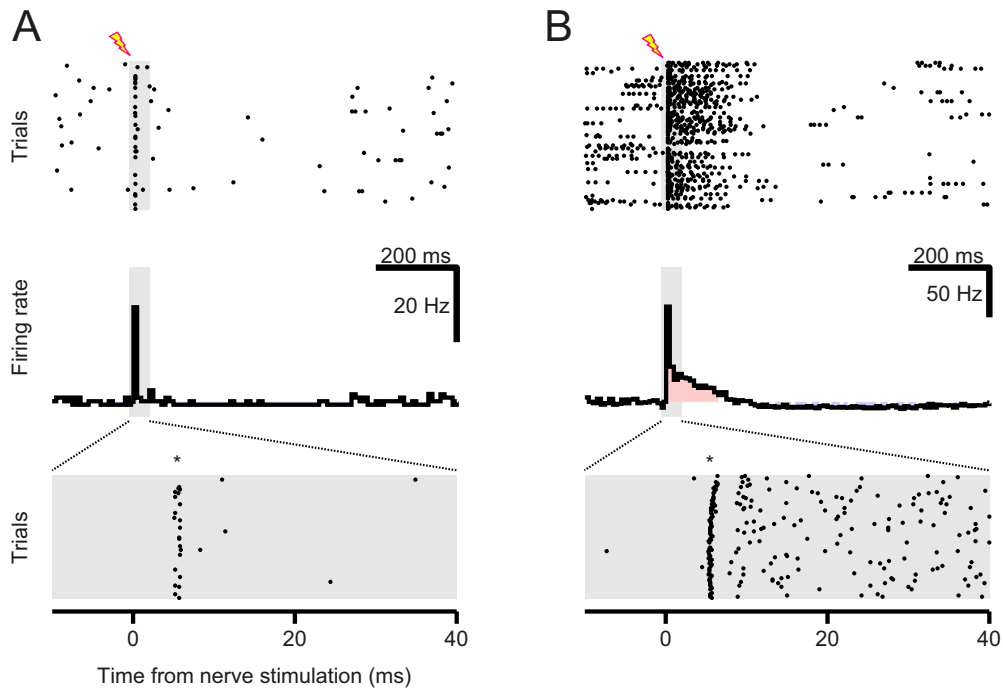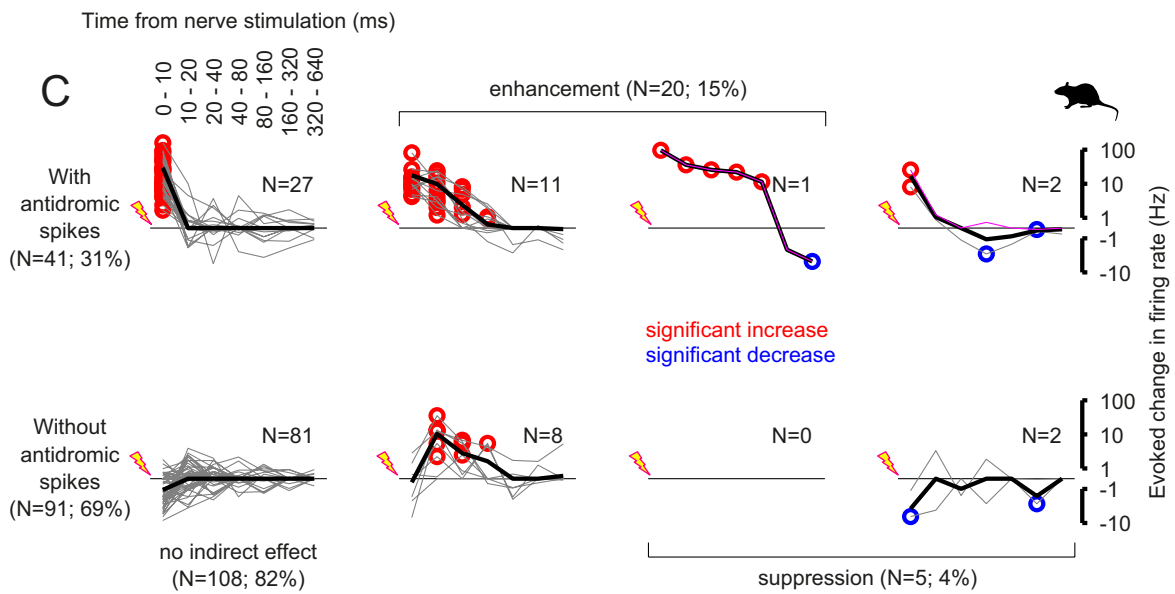

Supplement: pone.0254611.s005.pdf [file pone.0254611.s005.pdf]
